# Supplementary material for: Regular tuning of the ESIPT reaction of 3-hydroxychromone-based derivatives by substitution of functional groups
Source: Royal Society of Chemistry journal article supplement (doi:10.1039/c9qo00722a), 2019-01-01
Supplement: c9qo00722a1.pdf [file c9qo00722a1.pdf]

**Supplementary information for**  
**Regularly tuning the ESIPT reactions of 3-hydroxychromone-based**  
**derivatives by the functional group substitutions**

Chaofan Sun, Xing Su, Qiao Zhou and Ying Shi\*

Institute of Atomic and Molecular Physics, Jilin University, Changchun 130012,  
China

Corresponding author: Ying Shi

E-mail address: shi\_ying@jlu.edu.cn

Fax: +86-431-85168816

Tel: +86-431-85168817

**Contents:**

**Table S1.** Calculated transition properties of the studied molecules in DMSO by using TD-DFT/mPW1PW91/6-311++G(d) method.

**Table S2.** Calculated fluorescence properties of the studied molecules at enol and keto forms in DMSO by using TD-DFT/mPW1PW91/6-311++G(d) method.

**Table S3.** Obtained HOMO, LUMO energies and energy gaps ( $\Delta_{H-L}$ ) of the studied molecules based on the optimized structures of the enol and keto forms at  $S_1$  state (unit: eV).

**Table S1.** Calculated transition properties of the studied molecules in DMSO by using TD-DFT/mPW1PW91/6-311++G(d) method.

| Molecule | State | $\lambda_{\text{abs}}$ (nm) | Contribution MO | $f$    |
|----------|-------|-----------------------------|-----------------|--------|
| BFHC     | S1    | 382                         | (70.231%)H→L    | 0.8533 |
|          | S6    | 262                         | (60.321%)H-3→L  | 0.1599 |
| BTHC     | S1    | 382                         | (70.202%)H→L    | 0.7726 |
|          | S6    | 263                         | (61.559%)H-3→L  | 0.1569 |
| BSeHC    | S1    | 388                         | (70.058%)H→L    | 0.6396 |
|          | S2    | 358                         | (69.618%)H-1→L  | 0.2256 |
| BDFHC    | S1    | 410                         | (70.360%)H→L    | 0.9850 |
|          | S5    | 294                         | (67.414%)H→L+1  | 0.1861 |
| BDTHC    | S1    | 427                         | (70.227%)H→L    | 0.6208 |
|          | S2    | 368                         | (69.472%)H-1→L  | 0.4931 |
| BDSHC    | S1    | 440                         | (70.103%)H→L    | 0.4953 |
|          | S2    | 379                         | (69.353%)H-1→L  | 0.6469 |

**Table S2.** Calculated fluorescence properties of the studied molecules at enol and keto forms in DMSO by using TD-DFT/mPW1PW91/6-311++G(d) method.

| Molecule | Form | State | $\lambda_{flu}$ (nm) | Contribution MO | $f$    |
|----------|------|-------|----------------------|-----------------|--------|
| BFHC     | enol | S1    | 431                  | (70.419%)H→L    | 0.9436 |
|          | keto | S1    | 567                  | (71.288%)H→L    | 0.7199 |
| BTHC     | enol | S1    | 432                  | (70.369%)H→L    | 0.8875 |
|          | keto | S1    | 564                  | (71.210%)H→L    | 0.7095 |
| BSeHC    | enol | S1    | 438                  | (70.289%)H→L    | 0.8071 |
|          | keto | S1    | 567                  | (71.138%)H→L    | 0.6908 |
| BDFHC    | enol | S1    | 464                  | (70.488%)H→L    | 1.1117 |
|          | keto | S1    | 592                  | (71.293%)H→L    | 0.9297 |
| BDTHC    | enol | S1    | 482                  | (70.257%)H→L    | 0.8250 |
|          | keto | S1    | 601                  | (71.016%)H→L    | 0.8629 |
| BSeHC    | enol | S1    | 494                  | (70.088%)H→L    | 0.7028 |
|          | keto | S1    | 614                  | (70.602%)H→L    | 0.7727 |

**Table S3.** Obtained HOMO, LUMO energies and energy gaps ( $\Delta_{H-L}$ ) of the studied molecules based on the optimized structures of the enol and keto forms at  $S_1$  state (unit: eV).

| Molecule | Enol   |        |                | Keto   |        |                |
|----------|--------|--------|----------------|--------|--------|----------------|
|          | HOMO   | LUMO   | $\Delta_{H-L}$ | HOMO   | LUMO   | $\Delta_{H-L}$ |
| BFHC     | -5.896 | -2.848 | 3.048          | -5.512 | -3.222 | 2.291          |
| BTHC     | -5.897 | -2.857 | 3.040          | -5.526 | -3.213 | 2.314          |
| BSeHC    | -5.878 | -2.873 | 3.005          | -5.526 | -3.221 | 2.305          |
| BDFHC    | -5.691 | -2.869 | 2.822          | -5.406 | -3.224 | 2.182          |
| BDTHC    | -5.658 | -2.904 | 2.754          | -5.412 | -3.237 | 2.175          |
| BSeHC    | -5.624 | -2.920 | 2.704          | -5.399 | -3.248 | 2.151          |
